# Supplementary material for: Resourcization of Argillaceous Limestone with Mn3O4 Modification for Efficient Adsorption of Lead, Copper, and Nickel
Source: MDPI journal article supplement (doi:10.3390/toxics12010072), 2024-01-15
Supplement: s1 [file s1]

## Supplementary Material:

### **Resourcization of argillaceous limestone with Mn<sub>3</sub>O<sub>4</sub> modification for efficient adsorption of Cu<sup>2+</sup>, Ni<sup>2+</sup>, and Pb<sup>2+</sup>**

Deyun Li<sup>a, b</sup>, Yongtao Li<sup>a, b</sup>, Tian Hu<sup>b</sup>, Hanhao Li<sup>a, b</sup>, Jinjin Wang<sup>b</sup>, Zhen Zhang<sup>b</sup>, Shuran He<sup>c</sup>,

Yulong Zhang<sup>b, \*</sup>

<sup>a</sup> School of Environmental Science and Engineering, Shaanxi University of Science & Technology, Xi'an 710021, PR China.

<sup>b</sup> College of Natural Resources and Environment, Joint Institute for Environmental Research & Education, South China Agricultural University, Guangzhou 510642, China.

<sup>c</sup> College of Resource and Environment, Yunnan Agricultural University, Kunming, Yunnan 650201, China.

\*Corresponding authors:

Yulong Zhang (email: yulongzhang@scau.edu.cn).

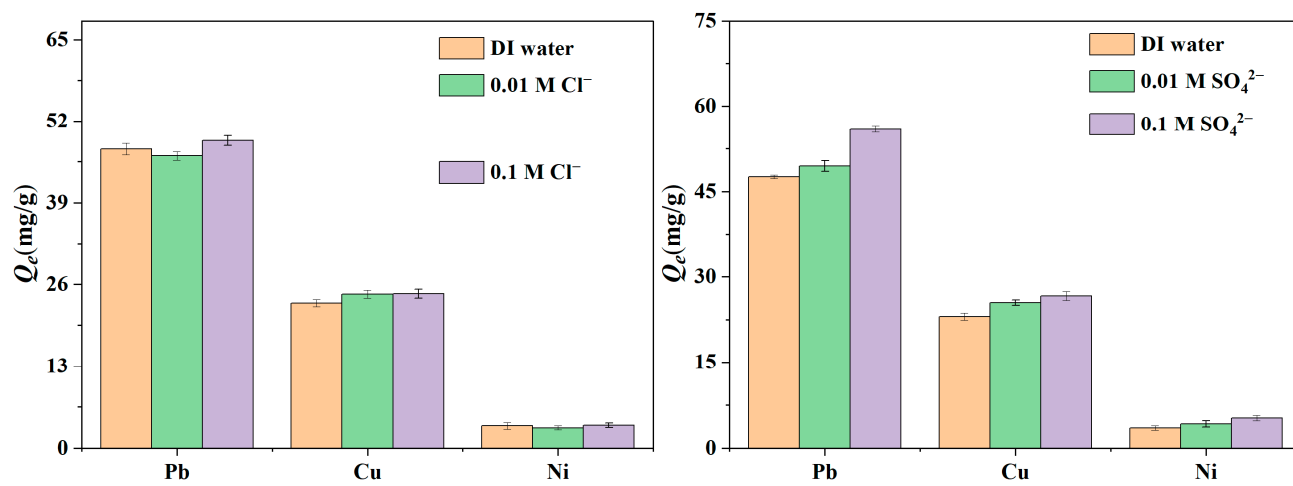

**Figure S1** Effect of anionic concentration on the adsorption of multi-heavy metal ions on Mn<sub>3</sub>O<sub>4</sub>–AL.

**Table S1** Physicochemical characteristics of Mn<sub>3</sub>O<sub>4</sub>-AL.

| Contents                              | Mn <sub>3</sub> O <sub>4</sub> -AL |
|---------------------------------------|------------------------------------|
| Total content of clay minerals (wt.%) | 13.5 ± 0.16                        |
| pH                                    | 7.92 ± 0.48                        |
| Point of zero charge                  | 3.20 ± 0.39                        |
| Cu (mg/kg)                            | 12.1 ± 0.75                        |
| Pb (mg/kg)                            | 38.1 ± 1.53                        |
| Ni (mg/kg)                            | 20.9 ± 1.08                        |
| TOC (g/kg)                            | 2.29 ± 0.71                        |
| DOC (mg/kg)                           | 2.24 ± 0.19                        |
| BET surface area (m <sup>2</sup> /g)  | 24.5 ± 3.03                        |
| Pore volume (cm <sup>3</sup> /g)      | 0.12 ± 0.01                        |
| CEC (cmol (+)/kg)                     | 31.5 ± 1.82                        |

**Table S2** Langmuir and Freundlich fitting parameters of mono- and multi-heavy metal ions adsorption isotherm on Mn<sub>3</sub>O<sub>4</sub>-AL.

| Treatments | Langmuir |              |              | Freundlich |       |                                                   |
|------------|----------|--------------|--------------|------------|-------|---------------------------------------------------|
|            | $R^2$    | $Q_m$ (mg/g) | $K_L$ (L/mg) | $R^2$      | $1/n$ | $K_F$ (mg <sup>1-(1/n)</sup> L <sup>1/n</sup> /g) |
| Mono-Pb    | 0.95     | 148.73       | 0.76         | 0.85       | 0.23  | 65.09                                             |
| Multi-Pb   | 0.95     | 56.96        | 0.37         | 0.94       | 0.23  | 31.35                                             |
| Mono-Cu    | 0.98     | 41.30        | 0.35         | 0.71       | 0.08  | 31.52                                             |
| Multi-Cu   | 0.96     | 23.77        | 0.39         | 0.65       | 0.05  | 19.77                                             |
| Mono-Ni    | 0.98     | 60.87        | 5.26         | 0.87       | 0.37  | 12.42                                             |
| Multi-Ni   | 0.98     | 5.78         | 0.69         | 0.93       | 0.19  | 0.19                                              |

**Table S3** Comparison of maximum adsorption capacities by Mn<sub>3</sub>O<sub>4</sub>–AL with other mineral adsorbents (with or without modification) reported in previous studies.

| Adsorbate | Absorbent                                         | pH  | Dosage (g/L) | Temperature (°C) | Initial concentration (mg/L) | $Q_m$ (mg/g) | Reference  |
|-----------|---------------------------------------------------|-----|--------------|------------------|------------------------------|--------------|------------|
| Cu        | Mn <sub>3</sub> O <sub>4</sub> –AL                | 5.0 | 0.15         | 25               | 1–200                        | 41.30        | This study |
|           | Citosan-coated argillaceous limestone             | 5.0 | 0.15         | 25               | 1–200                        | 64.11        | [22]       |
|           | Magnetic bentonite hydrogel beads                 | 5.0 | 2            | 30               | 5–150                        | 56.79        | [43]       |
|           | Cationic surfactant modified bentonite            | 5.0 | 10           | 20               | 50–200                       | 50.76        | [29]       |
|           | Clinoptilolite                                    | 5.0 | 10           | 25               | 10–600                       | 33.76        | [44]       |
|           | Natural bentonite                                 | 5.0 | 1            | 30               | 5–250                        | 32.26        | [45]       |
|           | Surfactant modified montmorillonite               | 5.0 | 5            | 25               | 20–140                       | 14.87        | [46]       |
|           | Citosan-coated montmorillonite beads              | 4.0 | 3.33         | 25               | 10–200                       | 13.04        | [47]       |
|           | Iron-coated Australian zeolite                    | 6.5 | 1–25         | 25               | 5–50                         | 9.33         | [48]       |
|           | Na-montmorillonite                                | 5.5 | 25           | 20               | 0.21–4.14                    | 8.45         | [49]       |
|           | Palygorskite                                      | 5.0 | 10           | 25               | 0–100                        | 2.356        | [50]       |
| Ni        | Mn <sub>3</sub> O <sub>4</sub> –AL                | 5.0 | 0.15         | 25               | 1–200                        | 60.87        | This study |
|           | Polyacrylamide/sodium montmorillonite             | 6.0 | 2            | 20               | 20–180                       | 92.59        | [51]       |
|           | Fe <sup>3+</sup> -modified argillaceous limestone | 5.0 | 0.15         | 25               | 1–200                        | 50.9         | [24]       |
|           | Chitosan-clay composite                           | 4.5 | 4            | 20               | 50–800                       | 32.36        | [52]       |
|           | Natural bentonite                                 | 5.0 | 1            | 30               | 5–250                        | 26.32        | [45]       |
|           | Bentonites from Slovakia                          | 5.9 | 5            | 40               | 50–300                       | 21.93        | [53]       |
|           | Acid-activated nanobentonites                     | –   | 12           | 25               | 50–350                       | 14.41        | [54]       |
|           | Na-bentonite                                      | 5.0 | 6.0          | 25               | 0–50                         | 13.96        | [55]       |
|           | Citosan-coated montmorillonite beads              | 4.0 | 3.33         | 25               | 10–200                       | 12.18        | [47]       |
|           | Palygorskite                                      | 5.0 | 10           | 25               | 0–100                        | 0.481        | [50]       |

| Adsorbate | Absorbent                                         | pH  | Dosage<br>(g/L) | Temperature<br>(°C) | Initial concentration (mg/L) | $Q_m$<br>(mg/g) | Reference  |
|-----------|---------------------------------------------------|-----|-----------------|---------------------|------------------------------|-----------------|------------|
| Pb        | Mn <sub>3</sub> O <sub>4</sub> -AL                | 5.0 | 0.15            | 25                  | 1–200                        | 148.73          | This study |
|           | Citosan-coated argillaceous limestone             | 5.0 | 0.15            | 25                  | 1–200                        | 217.4           | [22]       |
|           | Fe <sup>3+</sup> -modified argillaceous limestone | 5.0 | 0.15            | 25                  | 1–200                        | 184.4           | [24]       |
|           | Clinoptilolite                                    | 5.0 | 10              | 25                  | 50–2500                      | 181.8           | [44]       |
|           | Sodium polyacrylate-grafted bentonite             | 5.0 | 1.25            | 25                  | 1100                         | 149.62          | [56]       |
|           | Mn-Substituted goethite                           | 5.0 | 1               | 25                  | 10–500                       | 90.09           | [57]       |
|           | Natural bentonite                                 | 5.0 | 1               | 30                  | 5–150                        | 85.47           | [45]       |
|           | Na-montmorillonite                                | 5.5 | 25              | 20                  | 0.21–4.14                    | 35.58           | [49]       |
|           | Citosan-coated montmorillonite beads              | 4.0 | 3.33            | 25                  | 10–200                       | 29.85           | [47]       |
|           | Iron-coated Australian zeolite                    | 6.5 | 1–25            | 25                  | 5–50                         | 11.16           | [48]       |
